# Supplementary material
Source: Springer Nature journal article supplement (https://www.springermedizin.de/resource/supplementary/12885_2008_1277_MOESM9_ESM.pdf/9471622)
Supplement: MOESM9 [file 9471622]

Additional file 9

File format: DOC

Title: Clinical and pathological characteristics of patients from tamoxifen-treated set

Description:

| <b>Characteristics</b> | <b>Tam-Treated<br/>n=45<br/>n (%)</b> |
|------------------------|---------------------------------------|
| Age                    |                                       |
| ≤ 55 yrs               | 4 (26.7)                              |
| > 55 yrs               | 11 (73.3)                             |
| Missing                | 30                                    |
| Median                 | 57 yrs (SD 13.8)                      |
| Min. - Max.            | 26 - 80 yrs                           |
| Tumor diameter         |                                       |
| ≤ 2 cm                 | 45 (100)                              |
| Tumor grade            |                                       |
| Grade 1                | 7 (17.5)                              |
| Grade 2                | 24 (60.0)                             |
| Grade 3                | 9 (22.5)                              |
| Missing                | 5                                     |
| Stage                  |                                       |
| I                      | 45 (100)                              |
| Distant recurrence     |                                       |
| Yes                    | 8 (17.8)                              |
| No                     | 37 (82.2)                             |
| Median follow up       | 5.8 yrs                               |
